# Supplementary figures and images for: Dynamics of long-term genomic selection
Source: Springer Nature journal article supplement (doi:10.1186/1297-9686-42-35), 2010-08-16

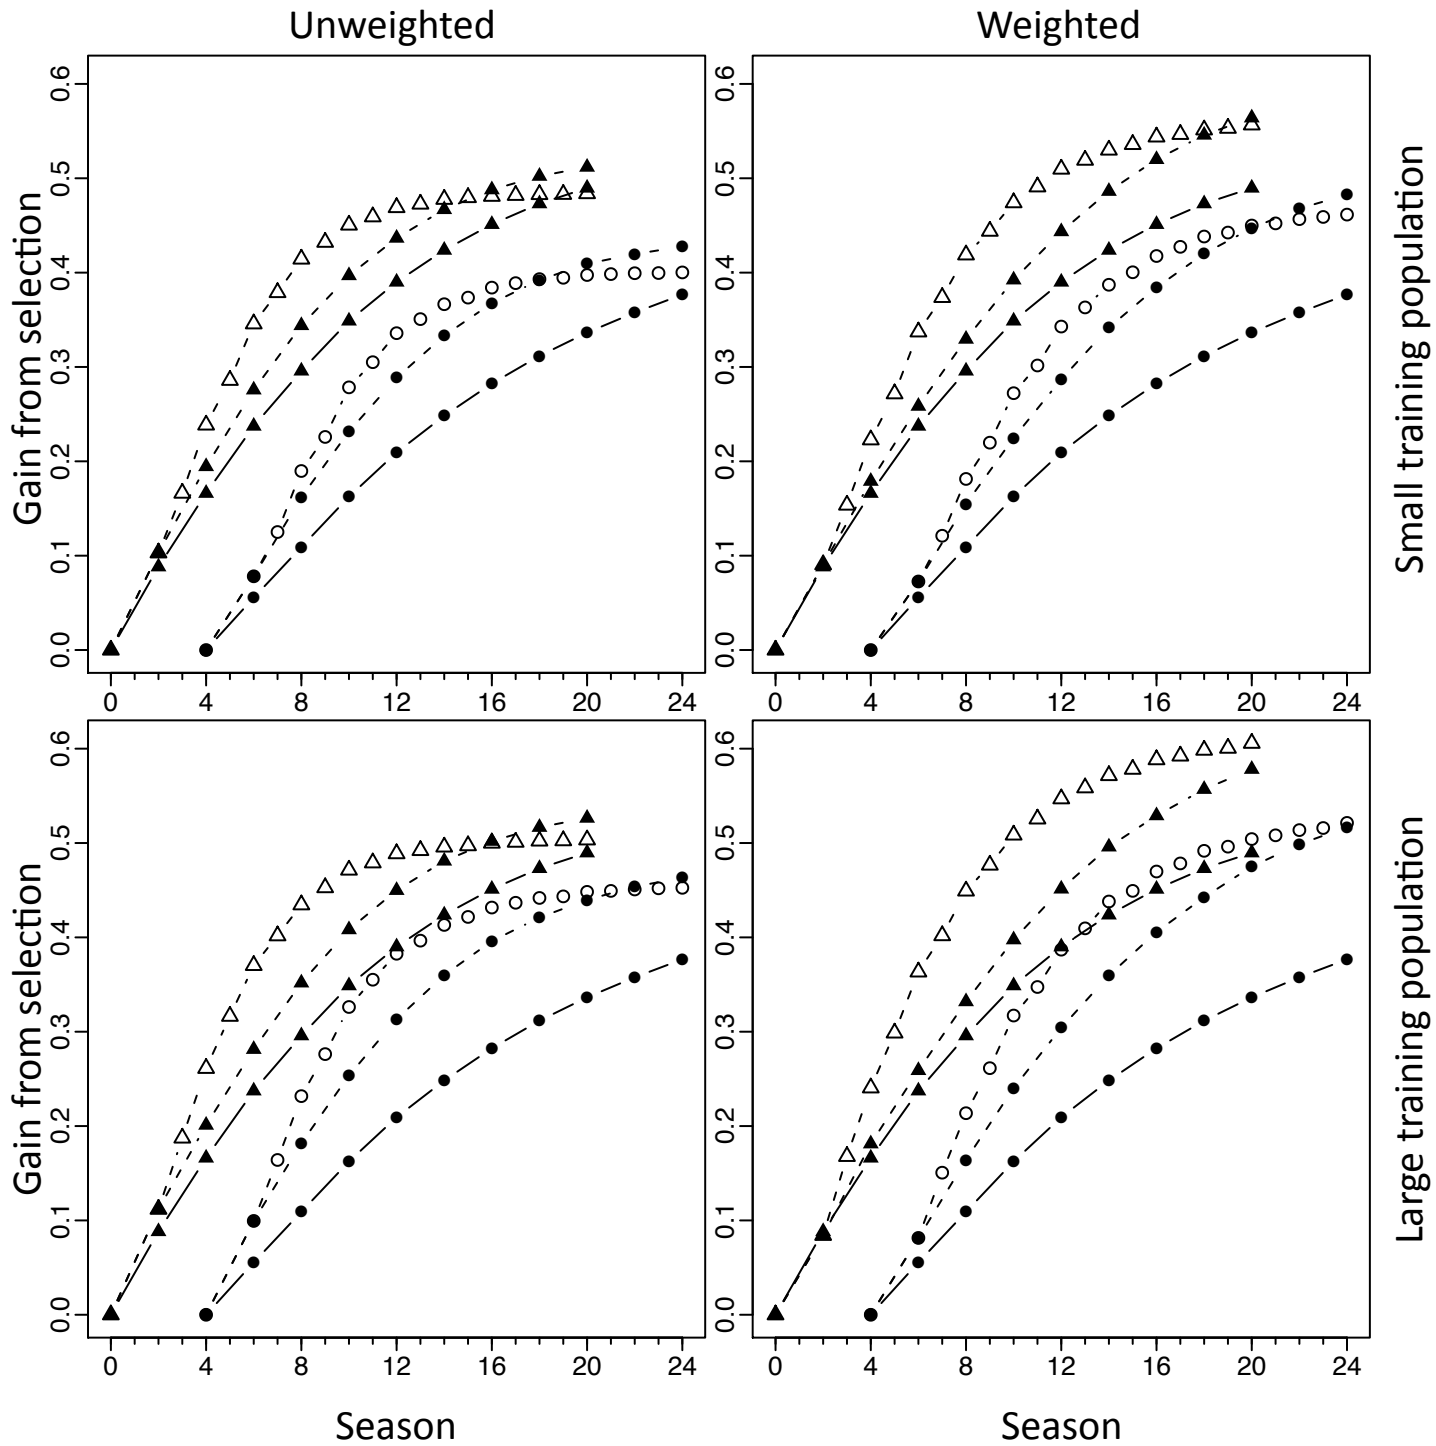

Supplement: Additional file 1 [file 1297-9686-42-35-s1.pdf]
